# Supplementary material for: The Autophagy-Related Musa acuminata Protein MaATG8F Interacts with MaATG4B, Regulating Banana Disease Resistance to Fusarium oxysporum f. sp. cubense Tropical Race 4
Source: Preprints.org preprint supplement (doi:10.20944/preprints202312.0297.v1), 2023-12-06
Supplement: Supplementary file 1 [file Table S1 ATG8 homologues identified in different plant species..xlsx]

## Sheet: Table S1
Accession	Gene Name	Gene ID	Homologous genes in Arabidopsis
A0A804I2U1	MaATG8A	Macma4_02_g16130	AT4G21980
A0A804IUP6	MaATG8B	Macma4_04_g29890	AT1G62040
A0A804IVM0	MaATG8C	Macma4_04_g32300	AT1G62040
A0A804IX32	MaATG8D	Macma4_04_g36560	AT1G62040
A0A804IZ38	MaATG8E	Macma4_04_g42290	AT1G62040
A0A804J066	MaATG8F	Macma4_05_g02860	AT1G62040
A0A804K599	MaATG8G	Macma4_08_g10850	AT1G62040
A0A804J9Y8	MaATG8H	Macma4_05_g30830	AT2G45170
A0A804KUM9	MaATG8I	Macma4_10_g14070	AT3G60640
A0A804L424	MaATG8J	Macma4_11_g04160	AT3G15580
A8MS84	AtATG8A	At4g21980	-
Q9XEB5	AtATG8B	At4g04620	-
Q8S927	AtATG8C	At1g62040	-
F4IHC1	AtATG8D	At2g05630	-
Q8S926	AtATG8E	At2g45170	-
Q8VYK7	AtATG8F	At4g16520	-
Q9LZZ9	AtATG8G	At3g60640	-
Q8S925	AtATG8H	At3g06420	-
Q6Z1D5	OsATG8A	AT1G62040	-
Q7XPR1	OsATG8B	AT1G62040	-
Q69RC4	OsATG8C	AT1G62040	-
Q2RBS4	OsATG8D	AT3G15580	-
A0A0P0VJU6	OsATG8E	AT3G15580	-
Q6H6P0	OsATG8F	AT3G15580	-
A0A067F5U8	CsATG8A	CISIN_1g033381mg	AT1G62040
A0A067GF68	CsATG8B	CISIN_1g033386mg	AT1G62040
A0A067ELD0	CsATG8C	CISIN_1g033424mg	AT2G05630
A0A067HD65	CsATG8D	CISIN_1g033512mg	AT4G16520
A0A067F249	CsATG8E	CISIN_1g033114mg	AT4G16520
A0A067F5Q6	CsATG8F	CISIN_1g033114mg	AT4G16520
A0A067EUW2	CsATG8G	CISIN_1g033424mg	AT2G05630
A0A067H4R6	CsATG8H	CISIN_1g033214mg	AT3G15580
A0A067FXT3	CsATG8I	CISIN_1g033384mg	AT3G06420
A0A067FE29	CsATG8J	CISIN_1g033114mg	AT4G16520
A0A067HCZ1	CsATG8K	CISIN_1g033512mg	AT4G16520
A0A8J5F1G9	ZoATG8A	ZIOFF_063332	AT4G21980
A0A8J5F354	ZoATG8B	ZIOFF_066301	AT4G21980
A0A8J5F743	ZoATG8C	ZIOFF_053382	AT3G15580
A0A8J5FCA5	ZoATG8D	ZIOFF_053379	AT3G15580
A0A8J5FSC3	ZoATG8E	ZIOFF_050881	AT1G62040
A0A8J5FTQ9	ZoATG8F	ZIOFF_047730	AT1G62040
A0A8J5G3H0	ZoATG8G	ZIOFF_038684	AT1G62040
A0A8J5GGX5	ZoATG8H	ZIOFF_032689	AT1G62040
A0A8J5GJJ1	ZoATG8I	ZIOFF_034979	AT1G62040
A0A8J5HRH7	ZoATG8J	ZIOFF_005926	AT2G05630
A0A8J5HYT2	ZoATG8K	ZIOFF_008445	AT2G05630
A0A8J5KV33	ZoATG8L	ZIOFF_046807	AT4G16520
A0A8J5L554	ZoATG8M	ZIOFF_031405	AT1G62040
A0A8J5LMW7	ZoATG8N	ZIOFF_005868	AT4G21980
A0A8J5M5V2	ZoATG8O	ZIOFF_007528	AT3G15580
A0A8J5M8I4	ZoATG8P	ZIOFF_001381	AT4G21980
A0A8J5KWP5	ZoATG8Q	ZIOFF_042052	AT1G62040
A0A8J5FS23	ZoATG8R	ZIOFF_042747	AT1G62040
A0A8J5LMD6	ZoATG8S	ZIOFF_000649	AT4G16520
A0A8J5M9Y3	ZoATG8T	ZIOFF_003080	AT3G15580
