# Supplementary material for: The Autophagy-Related Musa acuminata Protein MaATG8F Interacts with MaATG4B, Regulating Banana Disease Resistance to Fusarium oxysporum f. sp. cubense Tropical Race 4
Source: Preprints.org preprint supplement (doi:10.20944/preprints202312.0297.v1), 2023-12-06
Supplement: Supplementary file 2 [file Table S2 Primers used in this study..xlsx]

## Sheet: Sheet1
Number	Primer Name	Sequences (5’-3’)	Notes
1	MaATG4B-BD-F	ATGGAGGCCGAATTCCCGGGGATGACGGCCTTGCCTGAGAGA	Amplification of MaATG4B gene
2	MaATG4B-BD-R	AGGTCGACGGATCCCCGGGAATCATAGAATTTGCCATTCATCTTCGTGG
3	MaATG8A-AD-F	GCCAGTGAATTCCACCCGGGTATGGCGAAGAGTTCCTTCAAGTTGG	Amplification of MaATG8A gene
4	MaATG8A-AD-R	GTATCGATGCCCACCCGGGTGCTACATGGATCCAAATGTGTTCTCCCC
7	MaATG8B-AD-F	GCCAGTGAATTCCACCCGGGTATGGCGAAGAGTTCCTTCAAGTTGGAGC	Amplification of MaATG8B gene
8	MaATG8B-AD-R	GTATCGATGCCCACCCGGGTGTTAAACAGATCCAAATGTGTTCTCCCCG
9	MaATG8C-AD-F	GCCAGTGAATTCCACCCGGGTATGGCCAACAGCTCGTTCAAGC	Amplification of MaATG8C gene
10	MaATG8C-AD-R	GTATCGATGCCCACCCGGGTGTTAAAAGCGACCAAATGTGTTCTCGCC
11	MaATG8D-AD-F	GCCAGTGAATTCCACCCGGGTATGAAGCAGAAGTTGATATCCTTCAAGGAC	Amplification of MaATG8D gene
12	MaATG8D-AD-R	GTATCGATGCCCACCCGGGTGTCAACCAAAAGTCTTTTCACTACTGTAGCAC
13	MaATG8E-AD-F	GCCAGTGAATTCCACCCGGGTATGAAAATAATGATAGGGTCGCAGGGGT	Amplification of MaATG8E gene
14	MaATG8E-AD-R	GTATCGATGCCCACCCGGGTGCTACAAGGATGGCTCCTGCATCTTAG
15	MaATG8F-AD-F	GCCAGTGAATTCCACCCGGGTATGGCGAAGAATTCCTTCAAGTTGGAT	Amplification of MaATG8F gene
16	MaATG8F-AD-R	GTATCGATGCCCACCCGGGTGCTACGCAGACCCAAATGTGTTCTCC
17	MaATG8G-AD-F	GCCAGTGAATTCCACCCGGGTATGTCGAGGAGGCAGAGCAGC	Amplification of MaATG8G gene
18	MaATG8G-AD-R	GTATCGATGCCCACCCGGGTGCTACTGCATATTCTGGCTTCCGAAGG
19	MaATG8H-AD-F	GCCAGTGAATTCCACCCGGGTATGAAGCAGAAGTTGATATCCTTCAAGGAC	Amplification of MaATG8H gene
20	MaATG8H-AD-R	GTATCGATGCCCACCCGGGTGTCAACCAAAAGTCTTTTCACTACTGTAGC
21	MaATG8I-AD-F	GCCAGTGAATTCCACCCGGGTATGGCGAAGAGCCCCTTCAGAC	Amplification of MaATG8I gene
22	MaATG8I-AD-R	GTATCGATGCCCACCCGGGTGTTAATCTACAGGCATATCGTCGTAAGAGGA
23	MaATG8J-AD-F	GCCAGTGAATTCCACCCGGGTATGTCGAGGAGTCAGAGCAATTTCAAG	Amplification of MaATG8J gene
24	MaATG8J-AD-R	GTATCGATGCCCACCCGGGTGCTACTGCATATTCTGGCATCCGAAG
25	MaATG8F-NGFP-F	AGCTCGGTACCCGGGGATCCTATGGCGAAGAATTCCTTCAAGTTGGAT	Amplification of MaATG8F gene
26	MaATG8F-NGFP-R	GCTCTGCAGGTCGACTCTAGACTACGCAGACCCAAATGTGTTCTCC
27	MaATG8F-dsRNA-F	TAATACGACTCACTATAGGGAGAGGCGAAGAATTCCTTCAAGTTGGATAATC	Amplification of the template for synthesis of MaATG8F-dsRNA
28	MaATG8F-dsRNA-R	TAATACGACTCACTATAGGGAGATCCTTGTTTTCCTCGTAGATCGCAG
29	MaATG4B-dsRNA-F	TAATACGACTCACTATAGGGAGAGAGGGGTTATGGTTTAGCTGCTGGA	Amplification of the template for synthesis of MaATG4B-dsRNA
30	MaATG4B-dsRNA-R	TAATACGACTCACTATAGGGAGAGCACAGTGCTGCAGTGATATGAAGTA
	MaTUB-qPCR-F	TGTTGCATCCTGGTACTGCT	qRT-PCR analysis
	MaTUB-qPCR-R	GGCTTTCTTGCACTGGTACAC
	MaATG8F-qPCR-F	AAGCTGAGGCTGCTCGTATC	qRT-PCR analysis
	MaATG8F-qPCR-R	CACTGTGAGATCGGCAGGAA
