# Supplementary material for: The Autophagy-Related Musa acuminata Protein MaATG8F Interacts with MaATG4B, Regulating Banana Disease Resistance to Fusarium oxysporum f. sp. cubense Tropical Race 4
Source: Preprints.org preprint supplement (doi:10.20944/preprints202312.0297.v1), 2023-12-06
Supplement: Supplementary file 3 [file Table S3 DEGs of MaATG8 genes..xlsx]

## Sheet: DEGs of MaATG8 genes
Gene ID	Gene Name	BX-18 h	BX-32 h	BX-56 h	ZJ6-18 h	ZJ6-32 h	ZJ6-56 h
Macma4_02_g16130.1	MaATG8A	1.05951	2.33041	1.8417	1.99335	3.18746	2.09297
Macma4_04_g29890.1	MaATG8B	0.768716	1.79934	2.79459	2.79459	4.18271	3.55429
Macma4_04_g32300.1	MaATG8C	1.02463	1.99562	1.56282	2.41809	3.45614	2.66636
Macma4_04_g36560.1	MaATG8D	2.19185	3.14562	2.74	4.36398	5.4964	4.56706
Macma4_04_g42290.1	MaATG8E	-2.02534	-0.495231	0.279205	4.84833	5.87949	5.60364
Macma4_05_g02860.1	MaATG8F	0.245462	1.16488	0.831507	1.96139	3.12191	2.638
Macma4_08_g10850.1	MaATG8G	1.94326	3.01352	2.60248	2.00466	3.22499	2.50255
Macma4_05_g30830.1	MaATG8H	1.1837	2.10892	1.422	1.84856	2.94995	2.40838
Macma4_10_g14070.1	MaATG8I	-0.0185818	-0.129516	0.109404	0.412488	-0.00673826	0.432483
Macma4_11_g04160.1	MaATG8J	0.0179739	0.650266	0.195325	1.0066	1.74504	1.2863
